# Supplementary material for: Bio-Based Plastics Production, Impact and End of Life: A Literature Review and Content Analysis
Source: MDPI journal article supplement (doi:10.3390/su14084855), 2022-04-18

## Supplementary Materials

**Table S1.** Total number of publications (TNP) by leading Journals and number of Countries contributing in each journal.

| Journals                                | TNP | Countries |
|-----------------------------------------|-----|-----------|
| Polymers                                | 98  | 40        |
| Journal of Applied Polymer Science      | 65  | 24        |
| ACS Sustainable Chemistry Engineering   | 64  | 25        |
| European Polymer Journal                | 55  | 30        |
| Journal of Cleaner Production           | 42  | 28        |
| Polymer                                 | 42  | 18        |
| Journal Of Polymers and The Environment | 41  | 26        |
| Polymer Degradation and Stability       | 41  | 16        |
| Materials                               | 31  | 15        |
| Industrial Crops and Products           | 30  | 21        |

**Table S2.** Co-authorship by countries and authors with highest publication, NCC/A= Number of co-authoring countries/ authors, TLS= Total link strength

| Country | NCC | TLS | Author                 | NCA | TLS |
|---------|-----|-----|------------------------|-----|-----|
| PRC     | 29  | 108 | Bikiaris, Dimitrios N. | 29  | 61  |
| US      | 35  | 121 | Papageorgiou, George Z | 35  | 48  |
| France  | 39  | 106 | Jia, Puyou             | 39  | 36  |
| Italy   | 32  | 94  | Zhou, Younghong        | 32  | 34  |
| Spain   | 32  | 78  | Papadopoulos, Lazaros  | 32  | 31  |

**Table S3.** Sum of times cited (STC): documents, journals and countries

| Document                      | STC  | Journal                                 | STC  | Country | STC    |
|-------------------------------|------|-----------------------------------------|------|---------|--------|
| Mohanty Amar K. (2002)        | 1402 | Progress in Polymer Science             | 3182 | US      | 10,847 |
| Laurichesse, Stephanie (2014) | 990  | Journal of Polymers and the Environment | 1891 | PRC     | 5750   |
| Rhim, Jong Whan (2013)        | 939  | ACS Sustainable Chemistry Engineering   | 1634 | Japan   | 4962   |
| Sun, Zhuohua (2018)           | 758  | Polymers                                | 1393 | France  | 5836   |
| Tokiwa Yutaka (2009)          | 641  | Journal of Cleaner Production           | 1348 | Italy   | 2690   |

Figure S1 Direct Citation relation ship between countries

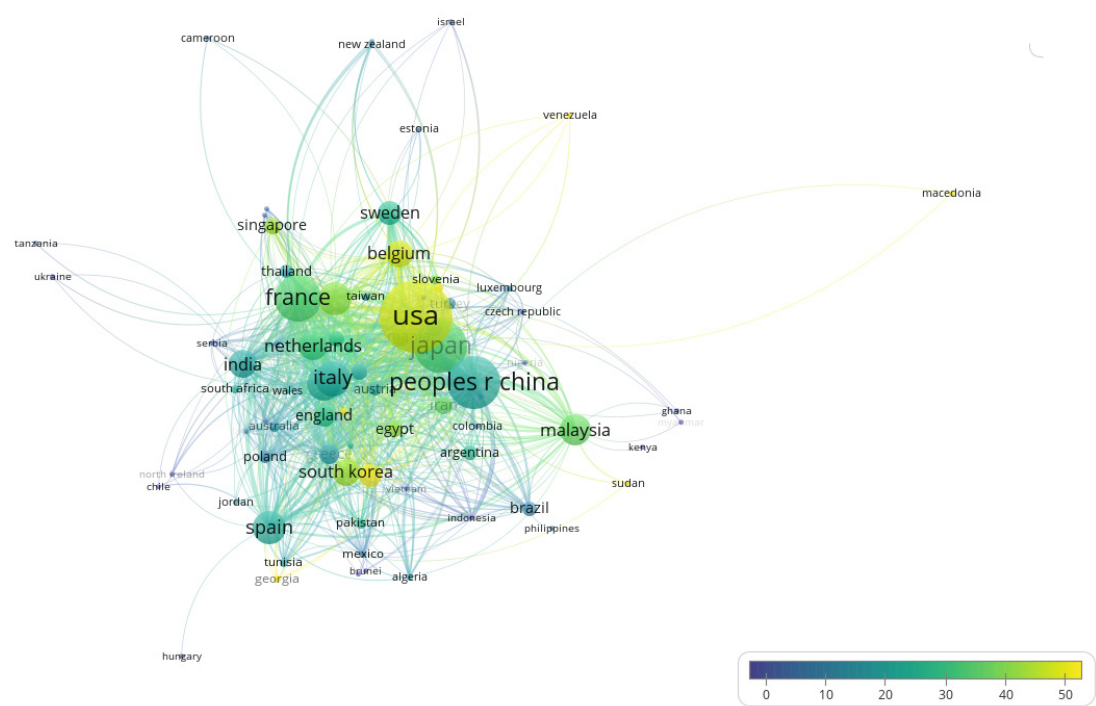

Supplement: s1 [file s1]
